# Supplementary material for: Theoretical investigation of the molecular and electronic structures and excitation spectra of iron phthalocyanine and its derivatives, FePc and FePcLn (L = Py, CN−; n = 1, 2)
Source: Royal Society of Chemistry journal article supplement (doi:10.1039/b823309h), 2009-01-01
Supplement: b823309h.pdf [file b823309h.pdf]

FePc

|    |                 |                 |                |
|----|-----------------|-----------------|----------------|
| Fe | 0.000000000000  | 0.000000000000  | 0.000000000000 |
| N  | 1.940802028486  | 0.000000000000  | 0.000000000000 |
| N  | 0.000000000000  | -1.940802028486 | 0.000000000000 |
| N  | -1.940802028486 | 0.000000000000  | 0.000000000000 |
| N  | 0.000000000000  | 1.940802028486  | 0.000000000000 |
| C  | 2.753852895331  | -1.113548118046 | 0.000000000000 |
| C  | 1.113548118046  | -2.753852895331 | 0.000000000000 |
| C  | -1.113548118046 | -2.753852895331 | 0.000000000000 |
| C  | -2.753852895331 | -1.113548118046 | 0.000000000000 |
| C  | -2.753852895331 | 1.113548118046  | 0.000000000000 |
| C  | -1.113548118046 | 2.753852895331  | 0.000000000000 |
| C  | 1.113548118046  | 2.753852895331  | 0.000000000000 |
| C  | 2.753852895331  | 1.113548118046  | 0.000000000000 |
| C  | 4.148951379485  | 0.702824626182  | 0.000000000000 |
| C  | 4.148951379485  | -0.702824626182 | 0.000000000000 |
| C  | 0.702824626182  | -4.148951379485 | 0.000000000000 |
| C  | -0.702824626182 | -4.148951379485 | 0.000000000000 |
| C  | -4.148951379485 | -0.702824626182 | 0.000000000000 |
| C  | -4.148951379485 | 0.702824626182  | 0.000000000000 |
| C  | -0.702824626182 | 4.148951379485  | 0.000000000000 |
| C  | 0.702824626182  | 4.148951379485  | 0.000000000000 |
| N  | 2.384008348978  | -2.384008348978 | 0.000000000000 |
| N  | -2.384008348978 | -2.384008348978 | 0.000000000000 |
| N  | -2.384008348978 | 2.384008348978  | 0.000000000000 |
| N  | 2.384008348978  | 2.384008348978  | 0.000000000000 |
| C  | 5.342631859533  | 1.426416378679  | 0.000000000000 |
| C  | 5.342631859533  | -1.426416378679 | 0.000000000000 |
| C  | 6.534559570139  | 0.704544163155  | 0.000000000000 |
| C  | 6.534559570139  | -0.704544163155 | 0.000000000000 |
| H  | 7.482772474599  | 1.235139408462  | 0.000000000000 |
| H  | 7.482772474599  | -1.235139408462 | 0.000000000000 |
| H  | 5.333751083002  | 2.511757120625  | 0.000000000000 |
| H  | 5.333751083002  | -2.511757120625 | 0.000000000000 |
| C  | 1.426416378679  | -5.342631859533 | 0.000000000000 |
| C  | -1.426416378679 | -5.342631859533 | 0.000000000000 |

|   |                 |                 |                |
|---|-----------------|-----------------|----------------|
| C | 0.704544163155  | -6.534559570139 | 0.000000000000 |
| C | -0.704544163155 | -6.534559570139 | 0.000000000000 |
| H | 1.235139408462  | -7.482772474599 | 0.000000000000 |
| H | -1.235139408462 | -7.482772474599 | 0.000000000000 |
| H | 2.511757120625  | -5.333751083002 | 0.000000000000 |
| H | -2.511757120625 | -5.333751083002 | 0.000000000000 |
| C | -5.342631859533 | -1.426416378679 | 0.000000000000 |
| C | -5.342631859533 | 1.426416378679  | 0.000000000000 |
| C | -6.534559570139 | -0.704544163155 | 0.000000000000 |
| C | -6.534559570139 | 0.704544163155  | 0.000000000000 |
| H | -7.482772474599 | -1.235139408462 | 0.000000000000 |
| H | -7.482772474599 | 1.235139408462  | 0.000000000000 |
| H | -5.333751083002 | -2.511757120625 | 0.000000000000 |
| H | -5.333751083002 | 2.511757120625  | 0.000000000000 |
| C | -1.426416378679 | 5.342631859533  | 0.000000000000 |
| C | 1.426416378679  | 5.342631859533  | 0.000000000000 |
| C | -0.704544163155 | 6.534559570139  | 0.000000000000 |
| C | 0.704544163155  | 6.534559570139  | 0.000000000000 |
| H | -1.235139408462 | 7.482772474599  | 0.000000000000 |
| H | 1.235139408462  | 7.482772474599  | 0.000000000000 |
| H | -2.511757120625 | 5.333751083002  | 0.000000000000 |
| H | 2.511757120625  | 5.333751083002  | 0.000000000000 |

FePc(Py)<sub>2</sub> (D<sub>2h</sub>)

|    |                 |                 |                |
|----|-----------------|-----------------|----------------|
| Fe | 0.000000000000  | 0.000000000000  | 0.000000000000 |
| N  | 1.382830984190  | 1.379678648006  | 0.000000000000 |
| N  | -1.382830984190 | 1.379678648006  | 0.000000000000 |
| N  | -1.382830984190 | -1.379678648006 | 0.000000000000 |
| N  | 1.382830984190  | -1.379678648006 | 0.000000000000 |
| C  | 1.164877606273  | 2.736239402340  | 0.000000000000 |
| C  | -1.164877606273 | 2.736239402340  | 0.000000000000 |
| C  | -2.742170100503 | 1.168221258041  | 0.000000000000 |
| C  | -2.742170100503 | -1.168221258040 | 0.000000000000 |
| C  | -1.164877606273 | -2.736239402340 | 0.000000000000 |
| C  | 1.164877606273  | -2.736239402340 | 0.000000000000 |
| C  | 2.742170100503  | -1.168221258041 | 0.000000000000 |

|   |                 |                 |                |
|---|-----------------|-----------------|----------------|
| C | 2.742170100503  | 1.168221258040  | 0.000000000000 |
| C | 3.441093064595  | 2.449143400011  | 0.000000000000 |
| C | 2.443802414839  | 3.439957502415  | 0.000000000000 |
| C | -2.443802414839 | 3.439957502416  | 0.000000000000 |
| C | -3.441093064595 | 2.449143400011  | 0.000000000000 |
| C | -3.441093064595 | -2.449143400011 | 0.000000000000 |
| C | -2.443802414839 | -3.439957502415 | 0.000000000000 |
| C | 2.443802414839  | -3.439957502416 | 0.000000000000 |
| C | 3.441093064595  | -2.449143400011 | 0.000000000000 |
| N | 0.000000000000  | 3.368848314680  | 0.000000000000 |
| N | -3.376801902447 | 0.000000000000  | 0.000000000000 |
| N | 0.000000000000  | -3.368848314680 | 0.000000000000 |
| N | 3.376801902447  | 0.000000000000  | 0.000000000000 |
| C | 4.794813323159  | 2.787107901456  | 0.000000000000 |
| C | 2.773734264890  | 4.795375191156  | 0.000000000000 |
| C | 5.125197177198  | 4.142176785213  | 0.000000000000 |
| C | 4.126681221559  | 5.134383191084  | 0.000000000000 |
| H | 6.170365986498  | 4.440363908802  | 0.000000000000 |
| H | 4.418375856694  | 6.181354336128  | 0.000000000000 |
| H | 5.558600416333  | 2.015369571484  | 0.000000000000 |
| H | 1.996656590999  | 5.553544961538  | 0.000000000000 |
| C | -2.773734264889 | 4.795375191156  | 0.000000000000 |
| C | -4.794813323159 | 2.787107901457  | 0.000000000000 |
| C | -4.126681221559 | 5.134383191084  | 0.000000000000 |
| C | -5.125197177197 | 4.142176785213  | 0.000000000000 |
| H | -4.418375856693 | 6.181354336129  | 0.000000000000 |
| H | -6.170365986497 | 4.440363908802  | 0.000000000000 |
| H | -1.996656590999 | 5.553544961538  | 0.000000000000 |
| H | -5.558600416333 | 2.015369571484  | 0.000000000000 |
| C | -4.794813323159 | -2.787107901456 | 0.000000000000 |
| C | -2.773734264890 | -4.795375191156 | 0.000000000000 |
| C | -5.125197177198 | -4.142176785213 | 0.000000000000 |
| C | -4.126681221559 | -5.134383191084 | 0.000000000000 |
| H | -6.170365986498 | -4.440363908802 | 0.000000000000 |
| H | -4.418375856694 | -6.181354336128 | 0.000000000000 |
| H | -5.558600416333 | -2.015369571484 | 0.000000000000 |

|   |                 |                 |                 |
|---|-----------------|-----------------|-----------------|
| H | -1.996656590999 | -5.553544961538 | 0.000000000000  |
| C | 2.773734264889  | -4.795375191156 | 0.000000000000  |
| C | 4.794813323159  | -2.787107901457 | 0.000000000000  |
| C | 4.126681221559  | -5.134383191084 | 0.000000000000  |
| C | 5.125197177197  | -4.142176785213 | 0.000000000000  |
| H | 4.418375856693  | -6.181354336129 | 0.000000000000  |
| H | 6.170365986497  | -4.440363908802 | 0.000000000000  |
| H | 1.996656590999  | -5.553544961538 | 0.000000000000  |
| H | 5.558600416333  | -2.015369571484 | 0.000000000000  |
| N | 0.000000000000  | 0.000000000000  | 2.060526867985  |
| C | 1.149977894819  | 0.000000000000  | 2.765420805889  |
| C | -1.149977894819 | 0.000000000000  | 2.765420805889  |
| C | 1.193929191761  | 0.000000000000  | 4.155811102055  |
| C | -1.193929191761 | 0.000000000000  | 4.155811102055  |
| C | 0.000000000000  | 0.000000000000  | 4.872807826852  |
| H | 2.066366893474  | 0.000000000000  | 2.192559268390  |
| H | -2.066366893474 | 0.000000000000  | 2.192559268390  |
| H | 2.156575640792  | 0.000000000000  | 4.656722371340  |
| H | -2.156575640792 | 0.000000000000  | 4.656722371340  |
| H | 0.000000000000  | 0.000000000000  | 5.959018503781  |
| N | 0.000000000000  | 0.000000000000  | -2.060526867985 |
| C | -1.149977894819 | 0.000000000000  | -2.765420805889 |
| C | 1.149977894819  | 0.000000000000  | -2.765420805889 |
| C | -1.193929191761 | 0.000000000000  | -4.155811102055 |
| C | 1.193929191761  | 0.000000000000  | -4.155811102055 |
| C | 0.000000000000  | 0.000000000000  | -4.872807826852 |
| H | -2.066366893474 | 0.000000000000  | -2.192559268390 |
| H | 2.066366893474  | 0.000000000000  | -2.192559268390 |
| H | -2.156575640792 | 0.000000000000  | -4.656722371340 |
| H | 2.156575640792  | 0.000000000000  | -4.656722371340 |
| H | 0.000000000000  | 0.000000000000  | -5.959018503781 |

FePc(Py)<sub>2</sub> (*D*<sub>2d</sub>)

|    |                 |                |                |
|----|-----------------|----------------|----------------|
| Fe | 0.000000000000  | 0.000000000000 | 0.000000000000 |
| N  | 1.380510000000  | 1.380510000000 | 0.000000000000 |
| N  | -1.380510000000 | 1.380510000000 | 0.000000000000 |

|   |                 |                 |                 |
|---|-----------------|-----------------|-----------------|
| N | -1.380510000000 | -1.380510000000 | 0.000000000000  |
| N | 1.380510000000  | -1.380510000000 | 0.000000000000  |
| C | 1.166484000000  | 2.736951000000  | 0.063072000000  |
| C | -1.166484000000 | 2.736951000000  | 0.063072000000  |
| C | -2.736951000000 | 1.166484000000  | -0.063072000000 |
| C | -2.736951000000 | -1.166484000000 | -0.063072000000 |
| C | -1.166484000000 | -2.736951000000 | 0.063072000000  |
| C | 1.166484000000  | -2.736951000000 | 0.063072000000  |
| C | 2.736951000000  | -1.166484000000 | -0.063072000000 |
| C | 2.736951000000  | 1.166484000000  | -0.063072000000 |
| C | 3.438582000000  | 2.446223000000  | -0.043476000000 |
| C | 2.446223000000  | 3.438582000000  | 0.043476000000  |
| C | -2.446223000000 | 3.438582000000  | 0.043476000000  |
| C | -3.438582000000 | 2.446223000000  | -0.043476000000 |
| C | -3.438582000000 | -2.446223000000 | -0.043476000000 |
| C | -2.446223000000 | -3.438582000000 | 0.043476000000  |
| C | 2.446223000000  | -3.438582000000 | 0.043476000000  |
| C | 3.438582000000  | -2.446223000000 | -0.043476000000 |
| N | 0.000000000000  | 3.369598000000  | 0.101663000000  |
| N | -3.369598000000 | 0.000000000000  | -0.101663000000 |
| N | 0.000000000000  | -3.369598000000 | 0.101663000000  |
| N | 3.369598000000  | 0.000000000000  | -0.101663000000 |
| C | 4.792135000000  | 2.781251000000  | -0.086960000000 |
| C | 2.781251000000  | 4.792135000000  | 0.086960000000  |
| C | 5.127828000000  | 4.134403000000  | -0.043070000000 |
| C | 4.134403000000  | 5.127828000000  | 0.043070000000  |
| H | 6.173220000000  | 4.429921000000  | -0.076096000000 |
| H | 4.429921000000  | 6.173220000000  | 0.076096000000  |
| H | 5.551752000000  | 2.008402000000  | -0.153984000000 |
| H | 2.008402000000  | 5.551752000000  | 0.153984000000  |
| C | -2.781251000000 | 4.792135000000  | 0.086960000000  |
| C | -4.792135000000 | 2.781251000000  | -0.086960000000 |
| C | -4.134403000000 | 5.127828000000  | 0.043070000000  |
| C | -5.127828000000 | 4.134403000000  | -0.043070000000 |
| H | -4.429921000000 | 6.173220000000  | 0.076096000000  |
| H | -6.173220000000 | 4.429921000000  | -0.076096000000 |

|   |                 |                 |                 |
|---|-----------------|-----------------|-----------------|
| H | -2.008402000000 | 5.551752000000  | 0.153984000000  |
| H | -5.551752000000 | 2.008402000000  | -0.153984000000 |
| C | -4.792135000000 | -2.781251000000 | -0.086960000000 |
| C | -2.781251000000 | -4.792135000000 | 0.086960000000  |
| C | -5.127828000000 | -4.134403000000 | -0.043070000000 |
| C | -4.134403000000 | -5.127828000000 | 0.043070000000  |
| H | -6.173220000000 | -4.429921000000 | -0.076096000000 |
| H | -4.429921000000 | -6.173220000000 | 0.076096000000  |
| H | -5.551752000000 | -2.008402000000 | -0.153984000000 |
| H | -2.008402000000 | -5.551752000000 | 0.153984000000  |
| C | 2.781251000000  | -4.792135000000 | 0.086960000000  |
| C | 4.792135000000  | -2.781251000000 | -0.086960000000 |
| C | 4.134403000000  | -5.127828000000 | 0.043070000000  |
| C | 5.127828000000  | -4.134403000000 | -0.043070000000 |
| H | 4.429921000000  | -6.173220000000 | 0.076096000000  |
| H | 6.173220000000  | -4.429921000000 | -0.076096000000 |
| H | 2.008402000000  | -5.551752000000 | 0.153984000000  |
| H | 5.551752000000  | -2.008402000000 | -0.153984000000 |
| N | 0.000000000000  | 0.000000000000  | 2.054841000000  |
| C | 1.150709000000  | 0.000000000000  | 2.757728000000  |
| C | -1.150709000000 | 0.000000000000  | 2.757728000000  |
| C | 1.194602000000  | 0.000000000000  | 4.148050000000  |
| C | -1.194602000000 | 0.000000000000  | 4.148050000000  |
| C | 0.000000000000  | 0.000000000000  | 4.864376000000  |
| H | 2.065627000000  | 0.000000000000  | 2.181388000000  |
| H | -2.065627000000 | 0.000000000000  | 2.181388000000  |
| H | 2.156819000000  | 0.000000000000  | 4.649765000000  |
| H | -2.156819000000 | 0.000000000000  | 4.649765000000  |
| H | 0.000000000000  | 0.000000000000  | 5.950578000000  |
| N | 0.000000000000  | 0.000000000000  | -2.054841000000 |
| C | 0.000000000000  | 1.150709000000  | -2.757728000000 |
| C | 0.000000000000  | -1.150709000000 | -2.757728000000 |
| C | 0.000000000000  | 1.194602000000  | -4.148050000000 |
| C | 0.000000000000  | -1.194602000000 | -4.148050000000 |
| C | 0.000000000000  | 0.000000000000  | -4.864376000000 |
| H | 0.000000000000  | 2.065627000000  | -2.181388000000 |

|   |                |                 |                 |
|---|----------------|-----------------|-----------------|
| H | 0.000000000000 | -2.065627000000 | -2.181388000000 |
| H | 0.000000000000 | 2.156819000000  | -4.649765000000 |
| H | 0.000000000000 | -2.156819000000 | -4.649765000000 |
| H | 0.000000000000 | 0.000000000000  | -5.950578000000 |

FePc(Py)

|    |                 |                 |                |
|----|-----------------|-----------------|----------------|
| Fe | 0.000000000000  | 0.000000000000  | 0.192092782201 |
| N  | 1.372260866393  | 1.369981756047  | 0.370543024662 |
| N  | 1.372260866393  | -1.369981756047 | 0.370543024662 |
| N  | -1.372260866393 | -1.369981756047 | 0.370543024662 |
| N  | -1.372260866393 | 1.369981756047  | 0.370543024662 |
| C  | 2.734827756072  | 1.160410545872  | 0.393851290302 |
| C  | 2.734827756072  | -1.160410545872 | 0.393851290302 |
| C  | 1.163053925976  | -2.731990503011 | 0.434463534278 |
| C  | -1.163053925976 | -2.731990503011 | 0.434463534278 |
| C  | -2.734827756072 | -1.160410545872 | 0.393851290302 |
| C  | -2.734827756072 | 1.160410545872  | 0.393851290302 |
| C  | -1.163053925976 | 2.731990503011  | 0.434463534278 |
| C  | 1.163053925976  | 2.731990503011  | 0.434463534278 |
| C  | 2.440271669576  | 3.430194229565  | 0.489618818856 |
| C  | 3.433206063631  | 2.437187604681  | 0.461870364742 |
| C  | 3.433206063631  | -2.437187604681 | 0.461870364742 |
| C  | 2.440271669576  | -3.430194229565 | 0.489618818856 |
| C  | -2.440271669576 | -3.430194229565 | 0.489618818856 |
| C  | -3.433206063631 | -2.437187604681 | 0.461870364742 |
| C  | -3.433206063631 | 2.437187604681  | 0.461870364742 |
| C  | -2.440271669576 | 3.430194229565  | 0.489618818856 |
| N  | 3.370645568341  | 0.000000000000  | 0.384130834255 |
| N  | 0.000000000000  | -3.366699725936 | 0.446829769229 |
| N  | -3.370645568341 | 0.000000000000  | 0.384130834255 |
| N  | 0.000000000000  | 3.366699725936  | 0.446829769229 |
| C  | 2.772953145664  | 4.783777998450  | 0.562416130847 |
| C  | 4.788185420861  | 2.768541689768  | 0.506679979938 |
| C  | 4.126250196214  | 5.116123533445  | 0.600781963001 |
| C  | 5.121959668495  | 4.120407922325  | 0.573147297679 |
| H  | 4.421507001531  | 6.160592118632  | 0.655076538625 |

|   |                 |                 |                 |
|---|-----------------|-----------------|-----------------|
| H | 6.167624026485  | 4.414539480844  | 0.606215444894  |
| H | 1.998693878994  | 5.544318124801  | 0.588011767786  |
| H | 5.548603728184  | 1.994023645271  | 0.488937350688  |
| C | 4.788185420861  | -2.768541689768 | 0.506679979938  |
| C | 2.772953145664  | -4.783777998450 | 0.562416130847  |
| C | 5.121959668495  | -4.120407922325 | 0.573147297679  |
| C | 4.126250196214  | -5.116123533445 | 0.600781963001  |
| H | 6.167624026485  | -4.414539480844 | 0.606215444894  |
| H | 4.421507001531  | -6.160592118632 | 0.655076538625  |
| H | 5.548603728184  | -1.994023645271 | 0.488937350688  |
| H | 1.998693878994  | -5.544318124801 | 0.588011767786  |
| C | -2.772953145664 | -4.783777998450 | 0.562416130847  |
| C | -4.788185420861 | -2.768541689768 | 0.506679979938  |
| C | -4.126250196214 | -5.116123533445 | 0.600781963001  |
| C | -5.121959668495 | -4.120407922325 | 0.573147297679  |
| H | -4.421507001531 | -6.160592118632 | 0.655076538625  |
| H | -6.167624026485 | -4.414539480844 | 0.606215444894  |
| H | -1.998693878994 | -5.544318124801 | 0.588011767786  |
| H | -5.548603728184 | -1.994023645271 | 0.488937350688  |
| C | -4.788185420861 | 2.768541689768  | 0.506679979938  |
| C | -2.772953145664 | 4.783777998450  | 0.562416130847  |
| C | -5.121959668495 | 4.120407922325  | 0.573147297679  |
| C | -4.126250196214 | 5.116123533445  | 0.600781963001  |
| H | -6.167624026485 | 4.414539480844  | 0.606215444894  |
| H | -4.421507001531 | 6.160592118632  | 0.655076538625  |
| H | -5.548603728184 | 1.994023645271  | 0.488937350688  |
| H | -1.998693878994 | 5.544318124801  | 0.588011767786  |
| N | 0.000000000000  | 0.000000000000  | -1.744128082860 |
| C | 0.000000000000  | 1.156085573630  | -2.444423148985 |
| C | 0.000000000000  | -1.156085573630 | -2.444423148985 |
| C | 0.000000000000  | 1.195107207262  | -3.833363780112 |
| C | 0.000000000000  | -1.195107207262 | -3.833363780112 |
| C | 0.000000000000  | 0.000000000000  | -4.549724732753 |
| H | 0.000000000000  | 2.068487435598  | -1.864265670399 |
| H | 0.000000000000  | -2.068487435598 | -1.864265670399 |
| H | 0.000000000000  | 2.157061890877  | -4.335279178223 |



|   |                |                 |                 |
|---|----------------|-----------------|-----------------|
| H | 0.000000000000 | -2.157061890877 | -4.335279178223 |
| H | 0.000000000000 | 0.000000000000  | -5.635609643302 |

FePc(CN)<sub>2</sub>

|    |                 |                 |                |
|----|-----------------|-----------------|----------------|
| Fe | 0.000000000000  | 0.000000000000  | 0.000000000000 |
| N  | 0.000000000000  | 1.949322000000  | 0.000000000000 |
| N  | -1.949322000000 | 0.000000000000  | 0.000000000000 |
| N  | 0.000000000000  | -1.949322000000 | 0.000000000000 |
| N  | 1.949322000000  | 0.000000000000  | 0.000000000000 |
| C  | -1.109424000000 | 2.751146000000  | 0.000000000000 |
| C  | -2.751146000000 | 1.109424000000  | 0.000000000000 |
| C  | -2.751146000000 | -1.109424000000 | 0.000000000000 |
| C  | -1.109424000000 | -2.751146000000 | 0.000000000000 |
| C  | 1.109424000000  | -2.751146000000 | 0.000000000000 |
| C  | 2.751146000000  | -1.109424000000 | 0.000000000000 |
| C  | 2.751146000000  | 1.109424000000  | 0.000000000000 |
| C  | 1.109424000000  | 2.751146000000  | 0.000000000000 |
| C  | 0.703869000000  | 4.153823000000  | 0.000000000000 |
| C  | -0.703869000000 | 4.153823000000  | 0.000000000000 |
| C  | -4.153823000000 | 0.703869000000  | 0.000000000000 |
| C  | -4.153823000000 | -0.703869000000 | 0.000000000000 |
| C  | -0.703869000000 | -4.153823000000 | 0.000000000000 |
| C  | 0.703869000000  | -4.153823000000 | 0.000000000000 |
| C  | 4.153823000000  | -0.703869000000 | 0.000000000000 |
| C  | 4.153823000000  | 0.703869000000  | 0.000000000000 |
| N  | -2.384047000000 | 2.384047000000  | 0.000000000000 |
| N  | -2.384047000000 | -2.384047000000 | 0.000000000000 |
| N  | 2.384047000000  | -2.384047000000 | 0.000000000000 |
| N  | 2.384047000000  | 2.384047000000  | 0.000000000000 |
| C  | 1.421160000000  | 5.349717000000  | 0.000000000000 |
| C  | -1.421160000000 | 5.349717000000  | 0.000000000000 |
| C  | 0.703801000000  | 6.548144000000  | 0.000000000000 |
| C  | -0.703801000000 | 6.548144000000  | 0.000000000000 |
| H  | 1.238292000000  | 7.496897000000  | 0.000000000000 |
| H  | -1.238292000000 | 7.496897000000  | 0.000000000000 |
| H  | 2.507750000000  | 5.335901000000  | 0.000000000000 |

|   |                 |                 |                 |
|---|-----------------|-----------------|-----------------|
| H | -2.507750000000 | 5.335901000000  | 0.000000000000  |
| C | -5.349717000000 | 1.421160000000  | 0.000000000000  |
| C | -5.349717000000 | -1.421160000000 | 0.000000000000  |
| C | -6.548144000000 | 0.703801000000  | 0.000000000000  |
| C | -6.548144000000 | -0.703801000000 | 0.000000000000  |
| H | -7.496897000000 | 1.238292000000  | 0.000000000000  |
| H | -7.496897000000 | -1.238292000000 | 0.000000000000  |
| H | -5.335901000000 | 2.507750000000  | 0.000000000000  |
| H | -5.335901000000 | -2.507750000000 | 0.000000000000  |
| C | -1.421160000000 | -5.349717000000 | 0.000000000000  |
| C | 1.421160000000  | -5.349717000000 | 0.000000000000  |
| C | -0.703801000000 | -6.548144000000 | 0.000000000000  |
| C | 0.703801000000  | -6.548144000000 | 0.000000000000  |
| H | -1.238292000000 | -7.496897000000 | 0.000000000000  |
| H | 1.238292000000  | -7.496897000000 | 0.000000000000  |
| H | -2.507750000000 | -5.335901000000 | 0.000000000000  |
| H | 2.507750000000  | -5.335901000000 | 0.000000000000  |
| C | 5.349717000000  | -1.421160000000 | 0.000000000000  |
| C | 5.349717000000  | 1.421160000000  | 0.000000000000  |
| C | 6.548144000000  | -0.703801000000 | 0.000000000000  |
| C | 6.548144000000  | 0.703801000000  | 0.000000000000  |
| H | 7.496897000000  | -1.238292000000 | 0.000000000000  |
| H | 7.496897000000  | 1.238292000000  | 0.000000000000  |
| H | 5.335901000000  | -2.507750000000 | 0.000000000000  |
| H | 5.335901000000  | 2.507750000000  | 0.000000000000  |
| C | 0.000000000000  | 0.000000000000  | 1.993148000000  |
| C | 0.000000000000  | 0.000000000000  | -1.993148000000 |
| N | 0.000000000000  | 0.000000000000  | 3.165628000000  |
| N | 0.000000000000  | 0.000000000000  | -3.165628000000 |

FePc(CN<sup>-</sup>)

|    |          |          |          |
|----|----------|----------|----------|
| Fe | 0.       | 0.       | 0.09977  |
| N  | 0.       | 1.93124  | -0.05854 |
| N  | 1.93124  | 0.       | -0.05854 |
| N  | 0.       | -1.93124 | -0.05854 |
| N  | -1.93124 | 0.       | -0.05854 |

|   |          |          |          |
|---|----------|----------|----------|
| C | 1.11012  | 2.7473   | -0.0838  |
| C | 2.7473   | 1.11012  | -0.0838  |
| C | 2.7473   | -1.11012 | -0.0838  |
| C | 1.11012  | -2.7473  | -0.0838  |
| C | -1.11012 | -2.7473  | -0.0838  |
| C | -2.7473  | -1.11012 | -0.0838  |
| C | -2.7473  | 1.11012  | -0.0838  |
| C | -1.11012 | 2.7473   | -0.0838  |
| C | -0.70222 | 4.14533  | -0.12966 |
| C | 0.70222  | 4.14533  | -0.12966 |
| C | 4.14533  | 0.70222  | -0.12966 |
| C | 4.14533  | -0.70222 | -0.12966 |
| C | 0.70222  | -4.14533 | -0.12966 |
| C | -0.70222 | -4.14533 | -0.12966 |
| C | -4.14533 | -0.70222 | -0.12966 |
| C | -4.14533 | 0.70222  | -0.12966 |
| N | 2.38092  | 2.38092  | -0.08862 |
| N | 2.38092  | -2.38092 | -0.08862 |
| N | -2.38092 | -2.38092 | -0.08862 |
| N | -2.38092 | 2.38092  | -0.08862 |
| C | -1.42334 | 5.33934  | -0.17347 |
| C | 1.42334  | 5.33934  | -0.17347 |
| C | -0.70422 | 6.53352  | -0.21406 |
| C | 0.70422  | 6.53352  | -0.21406 |
| H | -1.23643 | 7.48157  | -0.24485 |
| H | 1.23643  | 7.48157  | -0.24485 |
| H | -2.50928 | 5.32722  | -0.17219 |
| H | 2.50928  | 5.32722  | -0.17219 |
| C | 5.33934  | 1.42334  | -0.17347 |
| C | 5.33934  | -1.42334 | -0.17347 |
| C | 6.53352  | 0.70422  | -0.21406 |
| C | 6.53352  | -0.70422 | -0.21406 |
| H | 7.48157  | 1.23643  | -0.24485 |
| H | 7.48157  | -1.23643 | -0.24485 |
| H | 5.32722  | 2.50928  | -0.17219 |
| H | 5.32722  | -2.50928 | -0.17219 |

|   |          |          |          |
|---|----------|----------|----------|
| C | 1.42334  | -5.33934 | -0.17347 |
| C | -1.42334 | -5.33934 | -0.17347 |
| C | 0.70422  | -6.53352 | -0.21406 |
| C | -0.70422 | -6.53352 | -0.21406 |
| H | 1.23643  | -7.48157 | -0.24485 |
| H | -1.23643 | -7.48157 | -0.24485 |
| H | 2.50928  | -5.32722 | -0.17219 |
| H | -2.50928 | -5.32722 | -0.17219 |
| C | -5.33934 | -1.42334 | -0.17347 |
| C | -5.33934 | 1.42334  | -0.17347 |
| C | -6.53352 | -0.70422 | -0.21406 |
| C | -6.53352 | 0.70422  | -0.21406 |
| H | -7.48157 | -1.23643 | -0.24485 |
| H | -7.48157 | 1.23643  | -0.24485 |
| H | -5.32722 | -2.50928 | -0.17219 |
| H | -5.32722 | 2.50928  | -0.17219 |
| C | 0.00000  | 0.00000  | 1.96258  |
| N | 0.00000  | 0.00000  | 3.13346  |

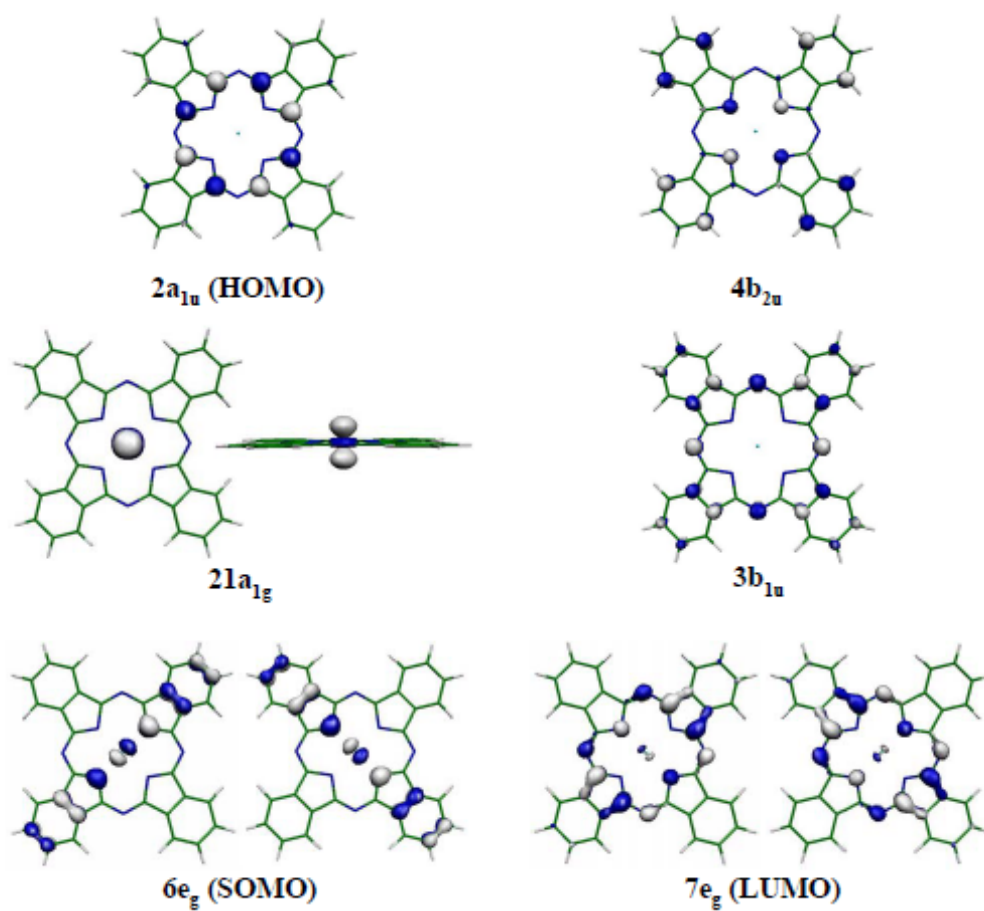

**Fig. S-1** Several molecular orbitals near the HOMO and LUMO of FePc. The orbital symmetries are labeled under the  $D_{4h}$  symmetry.

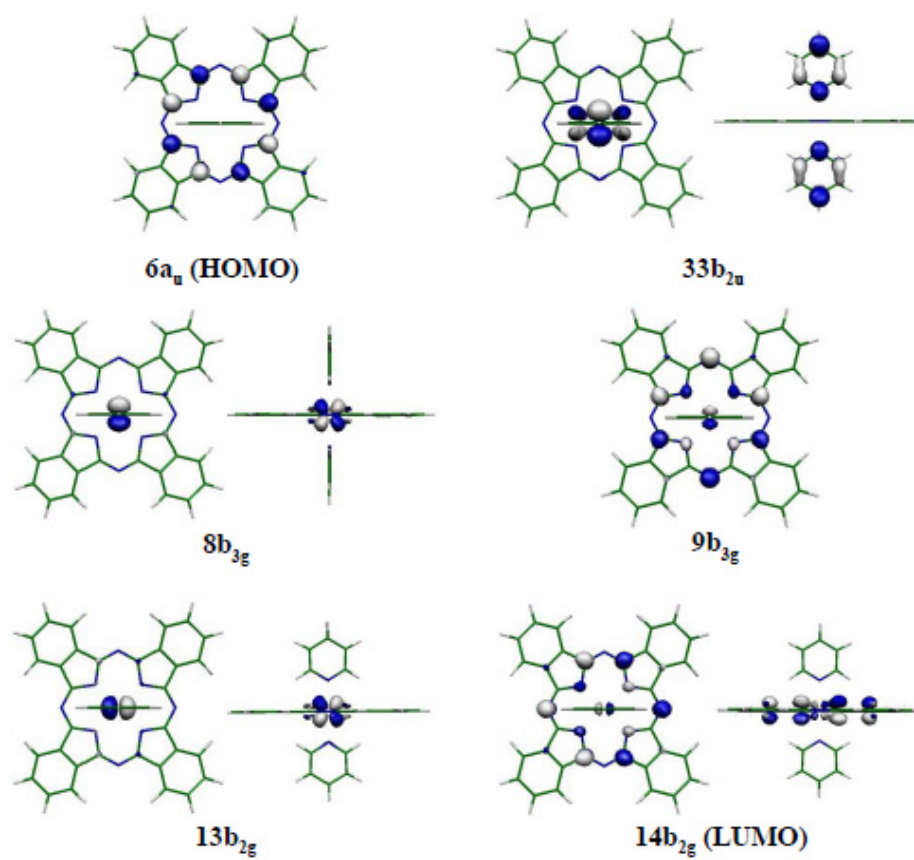

**Fig. S-2** Several molecular orbitals near the HOMO and LUMO of FePc(Py)<sub>2</sub>. The orbital symmetries are labeled under the  $D_{2h}$  symmetry.

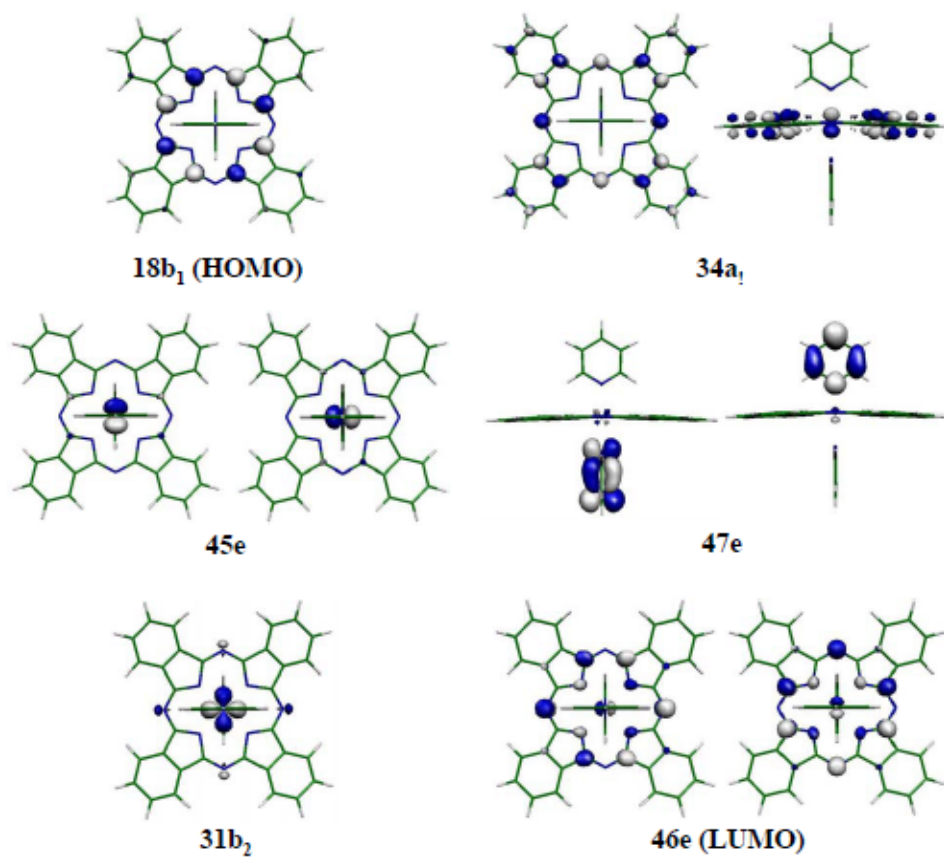

**Fig. S-3** Several molecular orbitals near the HOMO and LUMO of FePc(Py)<sub>2</sub>. The orbital symmetries are labeled under the  $D_{2d}$  symmetry.

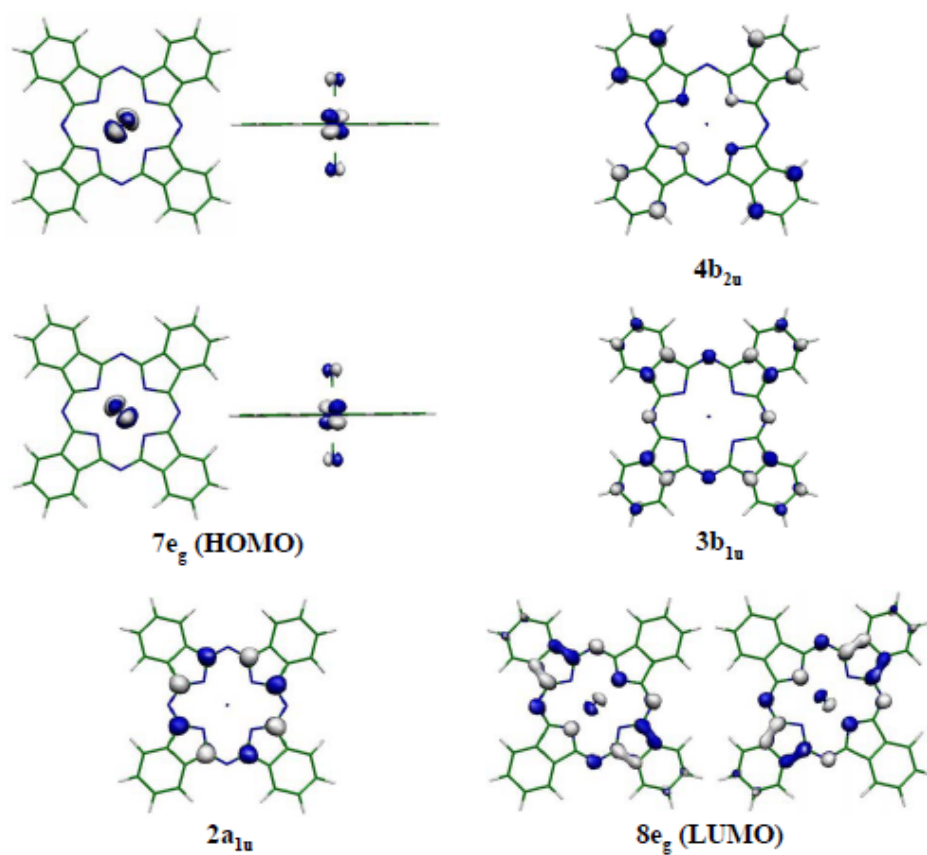

**Fig. S-4** Several molecular orbitals near the HOMO and LUMO of FePc(CN<sup>-</sup>)<sub>2</sub>. The orbital symmetries are labeled under the D<sub>4h</sub> symmetry.



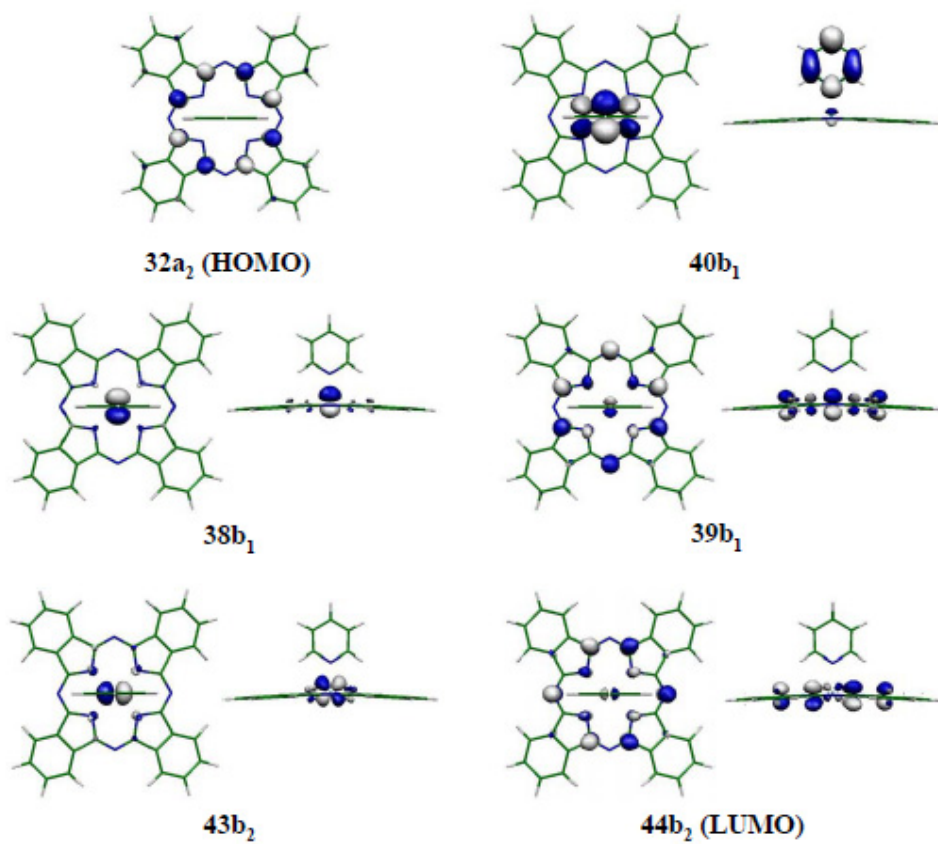

**Fig. S-5** Several molecular orbitals near the HOMO and LUMO of FePc(Py). The orbital symmetries are labeled under the  $C_{2v}$  symmetry.

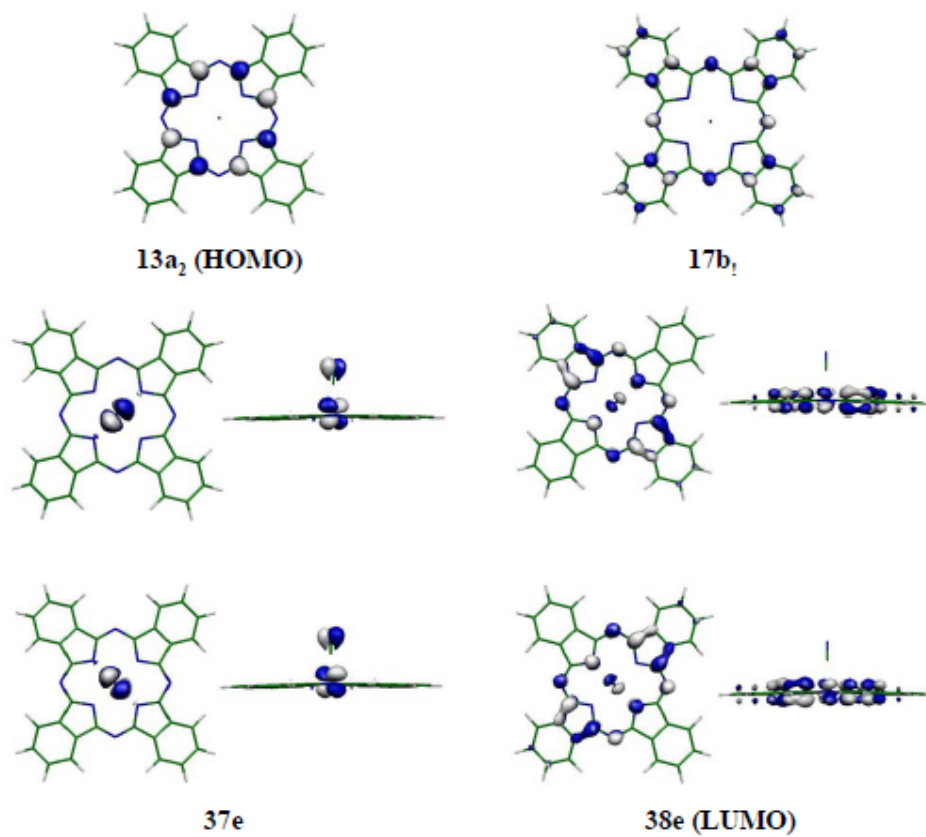

**Fig. S-6** Several molecular orbitals near the HOMO and LUMO of FePc(CN<sup>-</sup>). The orbital symmetries are labeled under the  $C_{4v}$  symmetry.

**Table S-1** B3LYP-optimized and X-ray observed bond lengths in Å of FePc, FePc(Py)<sub>2</sub>, FePc(Py), FePc(CN<sup>-</sup>)<sub>2</sub>, and FePc(CN<sup>-</sup>)

|                   | FePc<br><i>D</i> <sub>4h</sub><br>Calc. <sup>b</sup> | FePc<br><i>D</i> <sub>4h</sub><br>Expt. <sup>c</sup> | FePc(Py) <sub>2</sub><br><i>D</i> <sub>2h</sub><br>Calc. | FePc(Py) <sub>2</sub><br><i>D</i> <sub>2d</sub><br>Calc. | FePc(Py) <sub>2</sub><br><i>D</i> <sub>2h</sub><br>Expt. <sup>d</sup> | FePc(Py)<br><i>C</i> <sub>2v</sub><br>Calc. | FePc(CN <sup>-</sup> ) <sub>2</sub><br><i>D</i> <sub>4h</sub><br>Calc. | FePc(CN <sup>-</sup> ) <sub>2</sub><br><i>D</i> <sub>4h</sub><br>Expt. <sup>e</sup> | FePc(CN <sup>-</sup> )<br><i>C</i> <sub>4v</sub><br>Calc. |
|-------------------|------------------------------------------------------|------------------------------------------------------|----------------------------------------------------------|----------------------------------------------------------|-----------------------------------------------------------------------|---------------------------------------------|------------------------------------------------------------------------|-------------------------------------------------------------------------------------|-----------------------------------------------------------|
| a                 | 1.941 (1.939)                                        | 1.927                                                | 1.953, 1.953                                             | 1.952, 1.952                                             | 1.935                                                                 | 1.947, 1.947                                | 1.949                                                                  | 1.942                                                                               | 1.938                                                     |
| b                 | 1.379 (1.380)                                        | 1.378                                                | 1.376, 1.374                                             | 1.375, 1.375                                             | 1.372                                                                 | 1.379, 1.379                                | 1.369                                                                  | 1.373                                                                               | 1.378                                                     |
| c                 | 1.323 (1.323)                                        | 1.322                                                | 1.326, 1.329                                             | 1.328, 1.328                                             | 1.328                                                                 | 1.323, 1.325                                | 1.326                                                                  | 1.323                                                                               | 1.323                                                     |
| d                 | 1.454 (1.455)                                        | 1.45                                                 | 1.459, 1.460                                             | 1.460, 1.460                                             | 1.454                                                                 | 1.457, 1.457                                | 1.460                                                                  | 1.459                                                                               | 1.457                                                     |
| e                 | 1.396 (1.396)                                        | 1.395                                                | 1.395                                                    | 1.395                                                    | 1.392                                                                 | 1.396                                       | 1.395                                                                  | 1.387                                                                               | 1.396                                                     |
| f                 | 1.406 (1.404)                                        | 1.392                                                | 1.406                                                    | 1.406                                                    | 1.400                                                                 | 1.405                                       | 1.408                                                                  | 1.390                                                                               | 1.404                                                     |
| g                 | 1.393 (1.394)                                        | 1.39                                                 | 1.395                                                    | 1.395                                                    | 1.386                                                                 | 1.394                                       | 1.397                                                                  | 1.388                                                                               | 1.395                                                     |
| h                 | 1.409 (1.409)                                        | 1.394                                                | 1.408                                                    | 1.408                                                    | 1.387                                                                 | 1.408                                       | 1.408                                                                  | 1.389                                                                               | 1.408                                                     |
| Fe-N <sup>a</sup> | –                                                    | –                                                    | 2.061                                                    | 2.055                                                    | 2.040                                                                 | 1.936                                       | –                                                                      | –                                                                                   | –                                                         |
| Fe-C <sup>a</sup> | –                                                    | –                                                    | –                                                        | –                                                        | –                                                                     | –                                           | 1.993                                                                  | 1.981                                                                               | 1.863                                                     |

<sup>a</sup> Atomic distance between the central metal and axial ligand.

<sup>b</sup> Atomic distances of FePc with a singlet spin state are in parentheses (ref 22).

<sup>c</sup> Ref 11.

<sup>d</sup> The value are experimental distances for FePc(4Me-Py)<sub>2</sub> (ref 16).

<sup>e</sup> Ref 17.

**Table S-2** Orbital energies in eV and characters of FePc, FePc(Py)<sub>2</sub>, FePc(Py), FePc(CN<sup>-</sup>)<sub>2</sub>, and FePc(CN<sup>-</sup>)

| FePc              |         | FePc(Py) <sub>2</sub> |          |                   |          | FePc(Py)         |        |                  | FePc(CN <sup>-</sup> ) <sub>2</sub> |                   | FePc(CN <sup>-</sup> ) |                  |        |
|-------------------|---------|-----------------------|----------|-------------------|----------|------------------|--------|------------------|-------------------------------------|-------------------|------------------------|------------------|--------|
| $\alpha$          | $\beta$ | $D_{2h}$              | $D_{2d}$ | $C_{2v}$          | $D_{4h}$ | $C_{4v}$         |        |                  |                                     |                   |                        |                  |        |
| 7a <sub>2u</sub>  | -0.653  | 7a <sub>2u</sub>      | -0.019   | 20b <sub>1u</sub> | -0.704   | 19b <sub>1</sub> | -0.619 | 33a <sub>2</sub> | -0.512                              | 9e <sub>g</sub>   | 4.493                  | 39e              | 2.018  |
| 4b <sub>2u</sub>  | -0.908  | 7e <sub>g</sub>       | -0.851   | 10b <sub>3g</sub> | -1.099   | 16a <sub>2</sub> | -0.664 | 54a <sub>1</sub> | -0.803                              | 12a <sub>2u</sub> | 4.480                  | 19b <sub>2</sub> | 1.695  |
| 3b <sub>1u</sub>  | -1.067  | 4b <sub>2u</sub>      | -0.902   | 33b <sub>2u</sub> | -1.269   | 34a <sub>1</sub> | -0.699 | 40b <sub>1</sub> | -0.951                              | 4b <sub>2u</sub>  | 4.252                  | 32a <sub>1</sub> | 1.607  |
| 7e <sub>g</sub>   | -2.702  | 3b <sub>1u</sub>      | -1.059   | 9b <sub>3g</sub>  | -2.200   | 47e              | -1.195 | 39b <sub>1</sub> | -2.537                              | 3b <sub>1u</sub>  | 4.135                  | 17b <sub>1</sub> | 1.604  |
| -                 | -       | 6e <sub>g</sub>       | -2.939   | 14b <sub>2g</sub> | -2.218   | 46e              | -2.201 | 44b <sub>2</sub> | -2.537                              | 8e <sub>g</sub>   | 2.997                  | 38e              | 0.237  |
| 2a <sub>1u</sub>  | -4.986  | 2a <sub>1u</sub>      | -4.901   | 6a <sub>u</sub>   | -4.591   | 18b <sub>1</sub> | -4.583 | 32a <sub>2</sub> | -4.726                              | 7e <sub>g</sub>   | 0.632                  | 13a <sub>2</sub> | -2.195 |
| 21a <sub>1g</sub> | -6.392  | 21a <sub>1g</sub>     | -5.455   | 8b <sub>3g</sub>  | -5.059   | 45e              | -5.094 | 38b <sub>1</sub> | -5.336                              | 2a <sub>1u</sub>  | 0.487                  | 37e              | -2.303 |
| 6e <sub>g</sub>   | -6.397  | -                     | -        | 13b <sub>2g</sub> | -5.159   | 31b <sub>2</sub> | -5.396 | 43b <sub>2</sub> | -5.437                              | 14b <sub>2g</sub> | 0.047                  | 16b <sub>1</sub> | -2.801 |
| 14b <sub>2g</sub> | -6.680  | 14b <sub>2g</sub>     | -5.778   | 45a <sub>g</sub>  | -5.424   | 30b <sub>2</sub> | -6.254 | 53a <sub>1</sub> | -5.692                              | 11a <sub>1u</sub> | -0.156                 | 36e              | -4.002 |
| 3b <sub>2u</sub>  | -6.774  | 3b <sub>2u</sub>      | -6.776   | 19b <sub>1u</sub> | -6.254   | 15a <sub>2</sub> | -6.403 | 31a <sub>2</sub> | -6.559                              | 6e <sub>g</sub>   | -1.071                 | 31a <sub>1</sub> | -4.008 |
| 6a <sub>2u</sub>  | -6.803  | 6a <sub>2u</sub>      | -6.806   | 5a <sub>u</sub>   | -6.406   | 29b <sub>2</sub> | -6.523 | 52a <sub>1</sub> | -6.598                              | 31e <sub>u</sub>  | -1.237                 | 18b <sub>2</sub> | -4.141 |

**Table S-3** Symmetry-allowed TD-B3LYP excited states of FePc with the same spin multiplicity as the ground state

|      | state            | main configuration ( $ C  \geq 0.30$ )                                                                                                                                                                                                                                                                                                                                                                                                                       | $E^a$ | $f^b$  | $p^c$ |
|------|------------------|--------------------------------------------------------------------------------------------------------------------------------------------------------------------------------------------------------------------------------------------------------------------------------------------------------------------------------------------------------------------------------------------------------------------------------------------------------------|-------|--------|-------|
| FePc | 1E <sub>u</sub>  | -0.72(2a <sub>1u</sub> →7e <sub>g</sub> )(α)+0.91(2a <sub>1u</sub> →6e <sub>g</sub> )(β)<br>-0.72(2a <sub>1u</sub> →7e <sub>g</sub> )(α)+0.91(2a <sub>1u</sub> →6e <sub>g</sub> )(β)                                                                                                                                                                                                                                                                         | 1.05  | 0.006  | x+y   |
|      | 2E <sub>u</sub>  | -0.32(2a <sub>1u</sub> →7e <sub>g</sub> )(α)+0.65(2a <sub>1u</sub> →7e <sub>g</sub> )(α)+0.42(2a <sub>1u</sub> →6e <sub>g</sub> )(β)<br>+0.32(2a <sub>1u</sub> →7e <sub>g</sub> )(α)+0.65(2a <sub>1u</sub> →7e <sub>g</sub> )(α)+0.42(2a <sub>1u</sub> →6e <sub>g</sub> )(β)                                                                                                                                                                                 | 2.01  | 0.342  | x+y   |
|      | 3E <sub>u</sub>  | -0.47(6a <sub>2u</sub> →7e <sub>g</sub> )(α)-0.34(3b <sub>2u</sub> →7e <sub>g</sub> )(α)+0.59(6a <sub>2u</sub> →6e <sub>g</sub> )(β)+0.50(3b <sub>2u</sub> →6e <sub>g</sub> )(β)<br>-0.47(6a <sub>2u</sub> →7e <sub>g</sub> )(α)+0.34(3b <sub>2u</sub> →7e <sub>g</sub> )(α)+0.59(6a <sub>2u</sub> →6e <sub>g</sub> )(β)-0.50(3b <sub>2u</sub> →6e <sub>g</sub> )(β)                                                                                         | 2.87  | 0.002  | x+y   |
|      | 4E <sub>u</sub>  | -0.30(5a <sub>2u</sub> →7e <sub>g</sub> )(α)+0.31(6a <sub>2u</sub> →7e <sub>g</sub> )(α)-0.44(5a <sub>2u</sub> →6e <sub>g</sub> )(β)-0.36(6a <sub>2u</sub> →6e <sub>g</sub> )(β)+0.53(3b <sub>2u</sub> →6e <sub>g</sub> )(β)<br>+0.30(5a <sub>2u</sub> →7e <sub>g</sub> )(α)-0.31(6a <sub>2u</sub> →7e <sub>g</sub> )(α)-0.44(5a <sub>2u</sub> →6e <sub>g</sub> )(β)+0.36(6a <sub>2u</sub> →6e <sub>g</sub> )(β)+0.53(3b <sub>2u</sub> →6e <sub>g</sub> )(β) | 3.08  | 0.007  | x+y   |
|      | 5E <sub>u</sub>  | -0.31(2a <sub>1u</sub> →8e <sub>g</sub> )(α)+0.39(3b <sub>2u</sub> →6e <sub>g</sub> )(β)+0.62(2a <sub>1u</sub> →7e <sub>g</sub> )(β)<br>-0.31(2a <sub>1u</sub> →8e <sub>g</sub> )(α)+0.39(3b <sub>2u</sub> →6e <sub>g</sub> )(β)+0.62(2a <sub>1u</sub> →7e <sub>g</sub> )(β)                                                                                                                                                                                 | 3.26  | 0.031  | x+y   |
|      | 6E <sub>u</sub>  | -0.37(5a <sub>2u</sub> →7e <sub>g</sub> )(α)+0.52(5a <sub>2u</sub> →6e <sub>g</sub> )(β)+0.32(6a <sub>2u</sub> →6e <sub>g</sub> )(β)-0.33(3b <sub>2u</sub> →6e <sub>g</sub> )(β)+0.30(2a <sub>1u</sub> →7e <sub>g</sub> )(β)<br>-0.37(5a <sub>2u</sub> →7e <sub>g</sub> )(α)+0.52(5a <sub>2u</sub> →6e <sub>g</sub> )(β)+0.32(6a <sub>2u</sub> →6e <sub>g</sub> )(β)+0.33(3b <sub>2u</sub> →6e <sub>g</sub> )(β)-0.30(2a <sub>1u</sub> →7e <sub>g</sub> )(β) | 3.34  | 0.018  | x+y   |
|      | 7E <sub>u</sub>  | +0.67(3b <sub>2u</sub> →7e <sub>g</sub> )(α)+0.46(3b <sub>2u</sub> →7e <sub>g</sub> )(α)<br>+0.67(3b <sub>2u</sub> →7e <sub>g</sub> )(α)-0.46(3b <sub>2u</sub> →7e <sub>g</sub> )(α)                                                                                                                                                                                                                                                                         | 3.40  | 0.002  | x+y   |
|      | 8E <sub>u</sub>  | +0.79(2b <sub>1u</sub> →6e <sub>g</sub> )(β)-0.42(2a <sub>1u</sub> →7e <sub>g</sub> )(β)<br>+0.79(2b <sub>1u</sub> →6e <sub>g</sub> )(β)+0.42(2a <sub>1u</sub> →7e <sub>g</sub> )(β)                                                                                                                                                                                                                                                                         | 3.43  | 0.009  | x+y   |
|      | 1A <sub>1u</sub> | -0.36(30e <sub>u</sub> →7e <sub>g</sub> )(α)-0.36(30e <sub>u</sub> →7e <sub>g</sub> )(α)+0.55(30e <sub>u</sub> →6e <sub>g</sub> )(β)+0.55(30e <sub>u</sub> →6e <sub>g</sub> )(β)+0.31(14b <sub>2g</sub> →3b <sub>1u</sub> )(β)                                                                                                                                                                                                                               | 3.60  | 0.0001 | z     |
|      | 9E <sub>u</sub>  | +0.42(5a <sub>2u</sub> →7e <sub>g</sub> )(α)+0.62(6a <sub>2u</sub> →7e <sub>g</sub> )(α)+0.38(6a <sub>2u</sub> →6e <sub>g</sub> )(β)<br>+0.42(5a <sub>2u</sub> →7e <sub>g</sub> )(α)+0.62(6a <sub>2u</sub> →7e <sub>g</sub> )(α)+0.38(6a <sub>2u</sub> →6e <sub>g</sub> )(β)                                                                                                                                                                                 | 3.68  | 0.272  | x+y   |
|      | 10E <sub>u</sub> | -0.40(2b <sub>1u</sub> →7e <sub>g</sub> )(α)+0.53(2a <sub>1u</sub> →8e <sub>g</sub> )(α)-0.35(1a <sub>1u</sub> →6e <sub>g</sub> )(β)<br>+0.40(2b <sub>1u</sub> →7e <sub>g</sub> )(α)+0.53(2a <sub>1u</sub> →8e <sub>g</sub> )(α)-0.35(1a <sub>1u</sub> →6e <sub>g</sub> )(β)                                                                                                                                                                                 | 3.69  | 0.026  | x+y   |
|      | 11E <sub>u</sub> | +0.43(5a <sub>2u</sub> →7e <sub>g</sub> )(α)+0.43(2b <sub>1u</sub> →7e <sub>g</sub> )(α)-0.30(1a <sub>1u</sub> →6e <sub>g</sub> )(β)<br>+0.43(5a <sub>2u</sub> →7e <sub>g</sub> )(α)+0.43(2b <sub>1u</sub> →7e <sub>g</sub> )(α)+0.30(1a <sub>1u</sub> →6e <sub>g</sub> )(β)                                                                                                                                                                                 | 3.78  | 0.470  | x+y   |
|      | 12E <sub>u</sub> | -0.45(5a <sub>2u</sub> →7e <sub>g</sub> )(α)+0.52(2b <sub>1u</sub> →7e <sub>g</sub> )(α)-0.34(5a <sub>2u</sub> →6e <sub>g</sub> )(β)+0.35(2b <sub>1u</sub> →6e <sub>g</sub> )(β)<br>-0.45(5a <sub>2u</sub> →7e <sub>g</sub> )(α)+0.52(2b <sub>1u</sub> →7e <sub>g</sub> )(α)-0.34(5a <sub>2u</sub> →6e <sub>g</sub> )(β)+0.35(2b <sub>1u</sub> →6e <sub>g</sub> )(β)                                                                                         | 3.79  | 0.028  | x+y   |
|      | 13E <sub>u</sub> | -0.38(1a <sub>1u</sub> →7e <sub>g</sub> )(α)+0.49(2a <sub>1u</sub> →8e <sub>g</sub> )(α)+0.58(1a <sub>1u</sub> →6e <sub>g</sub> )(β)<br>-0.38(1a <sub>1u</sub> →7e <sub>g</sub> )(α)+0.49(2a <sub>1u</sub> →8e <sub>g</sub> )(α)+0.58(1a <sub>1u</sub> →6e <sub>g</sub> )(β)                                                                                                                                                                                 | 3.93  | 0.051  | x+y   |
|      | 2A <sub>1u</sub> | +0.56(30e <sub>u</sub> →7e <sub>g</sub> )(α)+0.56(30e <sub>u</sub> →7e <sub>g</sub> )(α)+0.31(30e <sub>u</sub> →6e <sub>g</sub> )(β)+0.31(30e <sub>u</sub> →6e <sub>g</sub> )(β)+0.30(14b <sub>2g</sub> →3b <sub>1u</sub> )(β)                                                                                                                                                                                                                               | 3.96  | 0.003  | z     |
|      | 3A <sub>1u</sub> | -0.30(30e <sub>u</sub> →6e <sub>g</sub> )(β)-0.30(30e <sub>u</sub> →6e <sub>g</sub> )(β)+0.90(14b <sub>2g</sub> →3b <sub>1u</sub> )(β)                                                                                                                                                                                                                                                                                                                       | 4.06  | 0.0001 | z     |
|      | 14E <sub>u</sub> | -0.35(2a <sub>1u</sub> →8e <sub>g</sub> )(α)+0.79(2a <sub>1u</sub> →8e <sub>g</sub> )(β)<br>-0.35(2a <sub>1u</sub> →8e <sub>g</sub> )(α)+0.79(2a <sub>1u</sub> →8e <sub>g</sub> )(β)                                                                                                                                                                                                                                                                         | 4.15  | 0.003  | x+y   |
|      | 4A <sub>1u</sub> | +0.99(21a <sub>1g</sub> →7a <sub>2u</sub> )(β)                                                                                                                                                                                                                                                                                                                                                                                                               | 4.19  | 0.004  | z     |
|      | 15E <sub>u</sub> | +0.69(1a <sub>1u</sub> →7e <sub>g</sub> )(α)+0.39(1a <sub>1u</sub> →7e <sub>g</sub> )(α)+0.37(1a <sub>1u</sub> →6e <sub>g</sub> )(β)<br>+0.69(1a <sub>1u</sub> →7e <sub>g</sub> )(α)-0.39(1a <sub>1u</sub> →7e <sub>g</sub> )(α)+0.37(1a <sub>1u</sub> →6e <sub>g</sub> )(β)                                                                                                                                                                                 | 4.30  | 0.046  | x+y   |

<sup>a</sup>  $E$ : excitation energy in eV.

<sup>b</sup>  $f$ : oscillator strength.

<sup>c</sup>  $p$ : polarization of the electrical dipole. The x and y axes directed toward two of four inner nitrogen atoms of the Pc ring.

**Table S-4** Symmetry-allowed TD-B3LYP excited states of FePc(Py)<sub>2</sub> (*D*<sub>2h</sub>) with the same spin multiplicity as the ground state

|                                                 | state                                       | main configuration ( $ C  \geq 0.30$ )                                                                                            | $E^a$ | $f^b$  | $p^c$ |
|-------------------------------------------------|---------------------------------------------|-----------------------------------------------------------------------------------------------------------------------------------|-------|--------|-------|
| FePc(Py) <sub>2</sub><br><i>D</i> <sub>2h</sub> | 1B <sub>3u</sub>                            | +0.62(6a <sub>u</sub> →9b <sub>3g</sub> )                                                                                         | 2.17  | 0.319  | x     |
|                                                 | 1B <sub>2u</sub>                            | +0.62(6a <sub>u</sub> →14b <sub>2g</sub> )                                                                                        | 2.19  | 0.372  | y     |
|                                                 | 2B <sub>3u</sub>                            | +0.70(6a <sub>u</sub> →10b <sub>3g</sub> )                                                                                        | 2.92  | 0.006  | x     |
|                                                 | 1B <sub>1u</sub>                            | +0.69(8b <sub>3g</sub> →33b <sub>2u</sub> )                                                                                       | 3.11  | 0.131  | z     |
|                                                 | 2B <sub>1u</sub>                            | +0.71(6a <sub>u</sub> →28b <sub>1g</sub> )                                                                                        | 3.42  | 0.004  | z     |
|                                                 | 3B <sub>3u</sub>                            | -0.40(5a <sub>u</sub> →9b <sub>3g</sub> )+0.46(19b <sub>1u</sub> →14b <sub>2g</sub> )                                             | 3.49  | 0.053  | x     |
|                                                 | 2B <sub>2u</sub>                            | +0.44(5a <sub>u</sub> →14b <sub>2g</sub> )-0.41(19b <sub>1u</sub> →9b <sub>3g</sub> )                                             | 3.49  | 0.039  | y     |
|                                                 | 4B <sub>3u</sub>                            | +0.40(5a <sub>u</sub> →14b <sub>2g</sub> )+0.47(8b <sub>3g</sub> →7a <sub>u</sub> )                                               | 3.66  | 0.009  | x     |
|                                                 | 3B <sub>2u</sub>                            | +0.50(5a <sub>u</sub> →14b <sub>2g</sub> )+0.34(19b <sub>1u</sub> →9b <sub>3g</sub> )                                             | 3.69  | 0.021  | y     |
|                                                 | 5B <sub>3u</sub>                            | +0.31(18b <sub>1u</sub> →14b <sub>2g</sub> )+0.38(5a <sub>u</sub> →9b <sub>3g</sub> )+0.43(8b <sub>3g</sub> →7a <sub>u</sub> )    | 3.74  | 0.008  | x     |
|                                                 | 4B <sub>2u</sub>                            | +0.61(8b <sub>3g</sub> →20b <sub>1u</sub> )                                                                                       | 3.74  | 0.029  | y     |
|                                                 | 5B <sub>2u</sub>                            | +0.49(18b <sub>1u</sub> →9b <sub>3g</sub> )-0.43(13b <sub>2g</sub> →7a <sub>u</sub> )                                             | 3.80  | 0.001  | y     |
|                                                 | 6B <sub>3u</sub>                            | +0.41(18b <sub>1u</sub> →14b <sub>2g</sub> )+0.56(13b <sub>2g</sub> →20b <sub>1u</sub> )                                          | 3.83  | 0.013  | x     |
|                                                 | 7B <sub>3u</sub>                            | -0.32(18b <sub>1u</sub> →14b <sub>2g</sub> )+0.31(13b <sub>2g</sub> →20b <sub>1u</sub> )+0.43(8b <sub>3g</sub> →8a <sub>u</sub> ) | 3.85  | 0.187  | x     |
|                                                 | 6B <sub>2u</sub>                            | +0.62(6a <sub>u</sub> →15b <sub>2g</sub> )                                                                                        | 3.90  | 0.0002 | y     |
|                                                 | 8B <sub>3u</sub>                            | +0.35(17b <sub>1u</sub> →14b <sub>2g</sub> )+0.58(6a <sub>u</sub> →11b <sub>3g</sub> )                                            | 3.91  | 0.015  | x     |
|                                                 | 7B <sub>2u</sub>                            | +0.35(18b <sub>1u</sub> →9b <sub>3g</sub> )+0.32(13b <sub>2g</sub> →7a <sub>u</sub> )+0.37(13b <sub>2g</sub> →8a <sub>u</sub> )   | 3.92  | 0.335  | y     |
|                                                 | 3B <sub>1u</sub>                            | +0.33(32b <sub>2u</sub> →9b <sub>3g</sub> )+0.58(45a <sub>g</sub> →20b <sub>1u</sub> )                                            | 3.96  | 0.002  | z     |
| 8B <sub>2u</sub>                                | +0.58(17b <sub>1u</sub> →9b <sub>3g</sub> ) | 3.98                                                                                                                              | 0.004 | y      |       |

<sup>a</sup>  $E$ : excitation energy in eV.

<sup>b</sup>  $f$ : oscillator strength.

<sup>c</sup>  $p$ : polarization of the electrical dipole. The x and y axes directed toward two of four inner nitrogen atoms of the Pc ring.

**Table S-5** Symmetry-allowed TD-B3LYP excited states of FePc(Py)<sub>2</sub> (*D*<sub>2d</sub>) with the same spin multiplicity as the ground state

|                       | state                  | main configuration ( $ C  \geq 0.30$ )                                                                                                                                       | $E^a$ | $f^b$  | $p^c$ |
|-----------------------|------------------------|------------------------------------------------------------------------------------------------------------------------------------------------------------------------------|-------|--------|-------|
| FePc(Py) <sub>2</sub> | 1B <sub>2</sub>        | +0.49(45e→46e)+0.49(45e→46e)                                                                                                                                                 | 1.94  | 0.001  | z     |
|                       | <i>D</i> <sub>2d</sub> |                                                                                                                                                                              |       |        |       |
|                       | 1E                     | +0.64(31b <sub>2</sub> →46e)<br>+0.64(31b <sub>2</sub> →46e)                                                                                                                 | 2.10  | 0.008  | x+y   |
|                       | 2E                     | +0.59(18b <sub>1</sub> →46e)<br>+0.59(18b <sub>1</sub> →46e)                                                                                                                 | 2.18  | 0.320  | x+y   |
|                       | 3E                     | +0.54(45e→35a <sub>1</sub> )<br>+0.54(45e→35a <sub>1</sub> )                                                                                                                 | 2.20  | 0.017  | x+y   |
|                       | 4E                     | +0.68(18b <sub>1</sub> →47e)<br>+0.68(18b <sub>1</sub> →47e)                                                                                                                 | 2.82  | 0.003  | x+y   |
|                       | 2B <sub>2</sub>        | +0.48(31b <sub>2</sub> →35a <sub>1</sub> )                                                                                                                                   | 2.94  | 0.032  | z     |
|                       | 3B <sub>2</sub>        | +0.42(45e→47e)+0.42(45e→47e)                                                                                                                                                 | 3.27  | 0.097  | z     |
|                       | 5E                     | +0.67(31b <sub>2</sub> →47e)<br>+0.67(31b <sub>2</sub> →47e)                                                                                                                 | 3.28  | 0.0001 | x+y   |
|                       | 4B <sub>2</sub>        | +0.69(18b <sub>1</sub> →16a <sub>2</sub> )                                                                                                                                   | 3.40  | 0.002  | z     |
|                       | 6E                     | -0.42(15a <sub>2</sub> →46e)+0.43(30b <sub>2</sub> →46e)<br>-0.42(15a <sub>2</sub> →46e)+0.43(30b <sub>2</sub> →46e)                                                         | 3.49  | 0.045  | x+y   |
|                       | 5B <sub>2</sub>        | +0.68(18b <sub>1</sub> →17a <sub>2</sub> )                                                                                                                                   | 3.63  | 0.0003 | z     |
|                       | 7E                     | -0.32(15a <sub>2</sub> →46e)+0.35(45e→16a <sub>2</sub> )<br>+0.32(15a <sub>2</sub> →46e)+0.35(45e→16a <sub>2</sub> )                                                         | 3.67  | 0.014  | x+y   |
|                       | 8E                     | +0.36(15a <sub>2</sub> →46e)+0.31(45e→34a <sub>1</sub> )+0.42(45e→16a <sub>2</sub> )<br>-0.36(15a <sub>2</sub> →46e)-0.31(45e→34a <sub>1</sub> )+0.42(45e→16a <sub>2</sub> ) | 3.74  | 0.001  | x+y   |
|                       | 9E                     | -0.38(29b <sub>2</sub> →46e)+0.56(45e→34a <sub>1</sub> )<br>-0.38(29b <sub>2</sub> →46e)+0.56(45e→34a <sub>1</sub> )                                                         | 3.79  | 0.011  | x+y   |
|                       | 10E                    | +0.35(28b <sub>2</sub> →46e)+0.49(45e→19b <sub>1</sub> )<br>+0.35(28b <sub>2</sub> →46e)+0.49(45e→19b <sub>1</sub> )                                                         | 3.81  | 0.005  | x+y   |
|                       | 6B <sub>2</sub>        | +0.45(43e→46e)+0.45(43e→46e)                                                                                                                                                 | 3.85  | 0.0001 | z     |
|                       | 11E                    | +0.37(29b <sub>2</sub> →46e)-0.33(45e→17a <sub>2</sub> )<br>+0.37(29b <sub>2</sub> →46e)+0.33(45e→17a <sub>2</sub> )                                                         | 3.86  | 0.191  | x+y   |
|                       | 12E                    | +0.45(28b <sub>2</sub> →46e)+0.38(18b <sub>1</sub> →48e)<br>+0.45(28b <sub>2</sub> →46e)+0.38(18b <sub>1</sub> →48e)                                                         | 3.90  | 0.013  | x+y   |
|                       | 13E                    | -0.31(33a <sub>1</sub> →46e)+0.46(18b <sub>1</sub> →48e)<br>+0.31(33a <sub>1</sub> →46e)+0.46(18b <sub>1</sub> →48e)                                                         | 3.90  | 0.042  | x+y   |
|                       | 7B <sub>2</sub>        | +0.59(31b <sub>2</sub> →34a <sub>1</sub> )                                                                                                                                   | 3.95  | 0.002  | z     |

<sup>a</sup>  $E$ : excitation energy in eV.

<sup>b</sup>  $f$ : oscillator strength.

<sup>c</sup>  $p$ : polarization of the electrical dipole. The x and y axes directed toward two of four inner nitrogen atoms of the Pc ring.

**Table S-6** Symmetry-allowed TD-B3LYP excited states of FePc(Py) with the same spin multiplicity as the ground state

|                  | state                                                                                | main configuration ( $ C  \geq 0.30$ )                                                                                         | $E^a$ | $f^b$  | $p^c$ |
|------------------|--------------------------------------------------------------------------------------|--------------------------------------------------------------------------------------------------------------------------------|-------|--------|-------|
| FePc(Py)         | 1B <sub>1</sub>                                                                      | +0.61(38b <sub>1</sub> →54a <sub>1</sub> )                                                                                     | 1.21  | 0.0003 | x     |
|                  | 1B <sub>2</sub>                                                                      | +0.60(43b <sub>2</sub> →54a <sub>1</sub> )                                                                                     | 1.21  | 0.0004 | y     |
|                  | 1A <sub>1</sub>                                                                      | +0.50(53a <sub>1</sub> →54a <sub>1</sub> )                                                                                     | 1.71  | 0.0004 | z     |
|                  | 2B <sub>2</sub>                                                                      | +0.62(32a <sub>2</sub> →39b <sub>1</sub> )                                                                                     | 2.16  | 0.364  | y     |
|                  | 2B <sub>1</sub>                                                                      | +0.61(32a <sub>2</sub> →44b <sub>2</sub> )                                                                                     | 2.16  | 0.387  | x     |
|                  | 3B <sub>1</sub>                                                                      | +0.68(53a <sub>1</sub> →39b <sub>1</sub> )                                                                                     | 2.24  | 0.002  | x     |
|                  | 2A <sub>1</sub>                                                                      | +0.40(43b <sub>2</sub> →44b <sub>2</sub> )+0.48(38b <sub>1</sub> →39b <sub>1</sub> )                                           | 2.25  | 0.0008 | z     |
|                  | 3B <sub>2</sub>                                                                      | +0.71(32a <sub>2</sub> →40b <sub>1</sub> )                                                                                     | 2.64  | 0.0007 | y     |
|                  | 3A <sub>1</sub>                                                                      | +0.47(43b <sub>2</sub> →44b <sub>2</sub> )-0.39(38b <sub>1</sub> →39b <sub>1</sub> )                                           | 2.65  | 0.040  | z     |
|                  | 4A <sub>1</sub>                                                                      | +0.67(32a <sub>2</sub> →33a <sub>2</sub> )                                                                                     | 3.27  | 0.001  | z     |
|                  | 5A <sub>1</sub>                                                                      | +0.60(38b <sub>1</sub> →40b <sub>1</sub> )                                                                                     | 3.29  | 0.056  | z     |
|                  | 6A <sub>1</sub>                                                                      | +0.68(32a <sub>2</sub> →34a <sub>2</sub> )                                                                                     | 3.55  | 0.0001 | z     |
|                  | 4B <sub>1</sub>                                                                      | +0.65(31a <sub>2</sub> →44b <sub>2</sub> )                                                                                     | 3.55  | 0.003  | x     |
|                  | 4B <sub>2</sub>                                                                      | +0.61(31a <sub>2</sub> →39b <sub>1</sub> )                                                                                     | 3.56  | 0.003  | y     |
|                  | 5B <sub>2</sub>                                                                      | +0.51(38b <sub>1</sub> →35a <sub>2</sub> )                                                                                     | 3.57  | 0.002  | y     |
|                  | 5B <sub>1</sub>                                                                      | +0.52(43b <sub>2</sub> →35a <sub>2</sub> )                                                                                     | 3.65  | 0.0001 | x     |
|                  | 6B <sub>2</sub>                                                                      | +0.68(38b <sub>1</sub> →33a <sub>2</sub> )                                                                                     | 3.68  | 0.001  | y     |
|                  | 6B <sub>1</sub>                                                                      | -0.30(52a <sub>1</sub> →39b <sub>1</sub> )+0.62(43b <sub>2</sub> →33a <sub>2</sub> )                                           | 3.77  | 0.033  | x     |
|                  | 7B <sub>2</sub>                                                                      | +0.58(52a <sub>1</sub> →44b <sub>2</sub> )                                                                                     | 3.80  | 0.241  | y     |
|                  | 7B <sub>1</sub>                                                                      | +0.32(50a <sub>1</sub> →39b <sub>1</sub> )+0.50(52a <sub>1</sub> →39b <sub>1</sub> )                                           | 3.82  | 0.154  | x     |
|                  | 7A <sub>1</sub>                                                                      | +0.30(36b <sub>1</sub> →39b <sub>1</sub> )-0.38(42b <sub>2</sub> →44b <sub>2</sub> )+0.48(37b <sub>1</sub> →39b <sub>1</sub> ) | 3.83  | 0.0002 | z     |
|                  | 8B <sub>2</sub>                                                                      | +0.56(51a <sub>1</sub> →44b <sub>2</sub> )                                                                                     | 3.85  | 0.027  | y     |
|                  | 8B <sub>1</sub>                                                                      | +0.36(51a <sub>1</sub> →39b <sub>1</sub> )+0.44(38b <sub>1</sub> →55a <sub>1</sub> )                                           | 3.85  | 0.006  | x     |
|                  | 9B <sub>1</sub>                                                                      | -0.37(51a <sub>1</sub> →39b <sub>1</sub> )+0.42(38b <sub>1</sub> →55a <sub>1</sub> )                                           | 3.89  | 0.052  | x     |
|                  | 9B <sub>2</sub>                                                                      | +0.64(49a <sub>1</sub> →44b <sub>2</sub> )                                                                                     | 3.90  | 0.001  | y     |
|                  | 10B <sub>1</sub>                                                                     | +0.60(49a <sub>1</sub> →39b <sub>1</sub> )                                                                                     | 3.91  | 0.015  | x     |
|                  | 10B <sub>2</sub>                                                                     | +0.57(32a <sub>2</sub> →41b <sub>1</sub> )                                                                                     | 3.92  | 0.008  | y     |
|                  | 11B <sub>1</sub>                                                                     | +0.54(32a <sub>2</sub> →45b <sub>2</sub> )                                                                                     | 3.92  | 0.049  | x     |
|                  | 11B <sub>2</sub>                                                                     | +0.51(43b <sub>2</sub> →55a <sub>1</sub> )                                                                                     | 3.95  | 0.001  | y     |
|                  | 12B <sub>2</sub>                                                                     | +0.42(50a <sub>1</sub> →39b <sub>1</sub> )                                                                                     | 4.01  | 0.063  | x     |
| 13B <sub>2</sub> | +0.33(50a <sub>1</sub> →44b <sub>2</sub> )+0.39(43b <sub>2</sub> →55a <sub>1</sub> ) | 4.01                                                                                                                           | 0.002 | y      |       |
| 8A <sub>1</sub>  | -0.39(35b <sub>1</sub> →39b <sub>1</sub> )+0.40(53a <sub>1</sub> →55a <sub>1</sub> ) | 4.03                                                                                                                           | 0.002 | z      |       |
| 9A <sub>1</sub>  | +0.50(41b <sub>2</sub> →44b <sub>2</sub> )-0.31(36b <sub>1</sub> →39b <sub>1</sub> ) | 4.09                                                                                                                           | 0.001 | z      |       |

<sup>a</sup>  $E$ : excitation energy in eV.

<sup>b</sup>  $f$ : oscillator strength.

<sup>c</sup>  $p$ : polarization of the electrical dipole. The x and y axes directed toward two of four inner nitrogen atoms of the Pc ring.



**Table S-7** Symmetry-allowed TD-B3LYP excited states of FePc(CN<sup>-</sup>)<sub>2</sub> with the same spin multiplicity as the ground state

|                                     | state            | main configuration ( $ C  \geq 0.30$ )                                                                                                                                     | $E^a$ | $f^b$  | $p^c$ |
|-------------------------------------|------------------|----------------------------------------------------------------------------------------------------------------------------------------------------------------------------|-------|--------|-------|
| FePc(CN <sup>-</sup> ) <sub>2</sub> | 1E <sub>u</sub>  | +0.36(11a <sub>2u</sub> →8e <sub>g</sub> )+0.57(2a <sub>1u</sub> →8e <sub>g</sub> )<br>-0.36(11a <sub>2u</sub> →8e <sub>g</sub> )+0.57(2a <sub>1u</sub> →8e <sub>g</sub> ) | 2.17  | 0.203  | x+y   |
|                                     | 2E <sub>u</sub>  | +0.56(11a <sub>2u</sub> →8e <sub>g</sub> )<br>+0.56(11a <sub>2u</sub> →8e <sub>g</sub> )                                                                                   | 2.60  | 0.117  | x+y   |
|                                     | 3E <sub>u</sub>  | +0.61(7e <sub>g</sub> →3b <sub>1u</sub> )-0.34(7e <sub>g</sub> →4b <sub>2u</sub> )<br>+0.61(7e <sub>g</sub> →3b <sub>1u</sub> )+0.34(7e <sub>g</sub> →4b <sub>2u</sub> )   | 2.91  | 0.018  | x+y   |
|                                     | 4E <sub>u</sub>  | +0.56(7e <sub>g</sub> →4b <sub>2u</sub> )<br>+0.56(7e <sub>g</sub> →4b <sub>2u</sub> )                                                                                     | 3.07  | 0.250  | x+y   |
|                                     | 5E <sub>u</sub>  | +0.66(7e <sub>g</sub> →12a <sub>2u</sub> )<br>+0.66(7e <sub>g</sub> →12a <sub>2u</sub> )                                                                                   | 3.33  | 0.192  | x+y   |
|                                     | 1A <sub>2u</sub> | +0.70(14b <sub>2g</sub> →3b <sub>1u</sub> )                                                                                                                                | 3.42  | 0.0002 | z     |
|                                     | 6E <sub>u</sub>  | +0.66(2a <sub>1u</sub> →9e <sub>g</sub> )<br>+0.66(2a <sub>1u</sub> →9e <sub>g</sub> )                                                                                     | 3.50  | 0.045  | x+y   |
|                                     | 7E <sub>u</sub>  | +0.63(3b <sub>2u</sub> →8e <sub>g</sub> )<br>+0.63(3b <sub>2u</sub> →8e <sub>g</sub> )                                                                                     | 3.95  | 0.022  | x+y   |
|                                     | 8E <sub>u</sub>  | +0.61(11a <sub>2u</sub> →9e <sub>g</sub> )<br>+0.61(11a <sub>2u</sub> →9e <sub>g</sub> )                                                                                   | 4.10  | 0.018  | x+y   |
|                                     | 9E <sub>u</sub>  | +0.52(10a <sub>2u</sub> →8e <sub>g</sub> )<br>+0.52(10a <sub>2u</sub> →8e <sub>g</sub> )                                                                                   | 4.14  | 0.518  | x+y   |
|                                     | 2A <sub>2u</sub> | +0.48(30e <sub>u</sub> →8e <sub>g</sub> )+0.48(30e <sub>u</sub> →8e <sub>g</sub> )                                                                                         | 4.21  | 0.003  | z     |

<sup>a</sup>  $E$ : excitation energy in eV.

<sup>b</sup>  $f$ : oscillator strength.

<sup>c</sup>  $p$ : polarization of the electrical dipole. The x and y axes directed toward two of four inner nitrogen atoms of the Pc ring.

**Table S-8** Symmetry-allowed TD-B3LYP excited states of FePc(CN<sup>-</sup>) with the same spin multiplicity as the ground state

|                        | state           | main configuration ( $ C  \geq 0.30$ )                                                                                                                                       | $E^a$ | $f^b$  | $p^c$  |
|------------------------|-----------------|------------------------------------------------------------------------------------------------------------------------------------------------------------------------------|-------|--------|--------|
| FePc(CN <sup>-</sup> ) | 1E              | +0.52(37e→32a <sub>1</sub> )+0.37(37e→33a <sub>1</sub> )<br>+0.52(37e→32a <sub>1</sub> )+0.37(37e→33a <sub>1</sub> )                                                         | 1.70  | 0.001  | x<br>y |
|                        | 2E              | +0.62(13a <sub>2</sub> →38e)<br>+0.62(13a <sub>2</sub> →38e)                                                                                                                 | 2.21  | 0.358  | x<br>y |
|                        | 1A <sub>1</sub> | +0.42(37e→38e)+0.42(37e→38e)                                                                                                                                                 | 2.38  | 0.011  | z      |
|                        | 3E              | +0.44(37e→17b <sub>1</sub> )-0.43(37e→19b <sub>2</sub> )<br>+0.44(37e→17b <sub>1</sub> )+0.43(37e→19b <sub>2</sub> )                                                         | 3.31  | 0.072  | y<br>x |
|                        | 4E              | +0.49(37e→20b <sub>2</sub> )<br>+0.49(37e→20b <sub>2</sub> )                                                                                                                 | 3.61  | 0.015  | x<br>y |
|                        | 2A <sub>1</sub> | +0.47(36e→38e)+0.47(36e→38e)                                                                                                                                                 | 3.63  | 0.0001 | z      |
|                        | 5E              | +0.34(18b <sub>2</sub> →38e)+0.47(13a <sub>2</sub> →39e)<br>+0.34(18b <sub>2</sub> →38e)+0.47(13a <sub>2</sub> →39e)                                                         | 3.67  | 0.009  | y<br>x |
|                        | 3A <sub>1</sub> | +0.69(16b <sub>1</sub> →17b <sub>1</sub> )                                                                                                                                   | 3.71  | 0.001  | z      |
|                        | 6E              | -0.36(18b <sub>2</sub> →38e)+0.48(13a <sub>2</sub> →39e)<br>-0.36(18b <sub>2</sub> →38e)+0.48(13a <sub>2</sub> →39e)                                                         | 3.77  | 0.109  | x<br>y |
|                        | 7E              | +0.33(18b <sub>2</sub> →38e)-0.33(37e→32a <sub>1</sub> )+0.45(37e→33a <sub>1</sub> )<br>-0.33(18b <sub>2</sub> →38e)-0.33(37e→32a <sub>1</sub> )+0.45(37e→33a <sub>1</sub> ) | 3.82  | 0.023  | y<br>x |
|                        | 4A <sub>1</sub> | +0.44(37e→39e)+0.44(37e→39e)                                                                                                                                                 | 3.85  | 0.004  | z      |
|                        | 8E              | +0.35(30a <sub>1</sub> →38e)-0.34(18b <sub>2</sub> →38e)+0.32(31a <sub>1</sub> →38e)<br>+0.35(30a <sub>1</sub> →38e)+0.34(18b <sub>2</sub> →38e)+0.32(31a <sub>1</sub> →38e) | 3.92  | 0.208  | y<br>x |
|                        | 9E              | +0.61(14b <sub>1</sub> →38e)<br>+0.61(14b <sub>1</sub> →38e)                                                                                                                 | 3.94  | 0.045  | y<br>x |
|                        | 10E             | +0.54(30a <sub>1</sub> →38e)-0.36(31a <sub>1</sub> →38e)<br>+0.54(30a <sub>1</sub> →38e)-0.36(31a <sub>1</sub> →38e)                                                         | 4.08  | 0.549  | y<br>x |
|                        | 5A <sub>1</sub> | -0.45(35e→38e)+0.45(35e→38e)                                                                                                                                                 | 4.17  | 0.001  | z      |
|                        | 6A <sub>1</sub> | +0.46(34e→38e)+0.46(34e→38e)                                                                                                                                                 | 4.21  | 0.005  | z      |
|                        | 11E             | +0.67(15b <sub>1</sub> →38e)<br>+0.67(15b <sub>1</sub> →38e)                                                                                                                 | 4.23  | 0.109  | y<br>x |
|                        | 12E             | +0.67(29a <sub>1</sub> →38e)<br>+0.67(29a <sub>1</sub> →38e)                                                                                                                 | 4.32  | 0.039  | x<br>y |

<sup>a</sup>  $E$ : excitation energy in eV.

<sup>b</sup>  $f$ : oscillator strength.

<sup>c</sup>  $p$ : polarization of the electrical dipole. The x and y axes directed toward two of four inner nitrogen atoms of the Pc ring.
